# Supplementary material for: Study on the relationship of depression, anxiety, lifestyle and eating habits to the severity of reflux esophagitis
Source: Research Square preprint supplement (doi:10.21203/rs.3.rs-108003/v1), 2020-12-02
Supplement: Supplementary file 1 [file 289f0a91110c75430893ac93.pdf]

## *Additional file 1*

### **Additional file Table S1. Questionnaire on demographic information, lifestyle and eating habits**

**Rongxin Wang**

**Jing Wang**

**Shuiqing Hu**

# Questionnaire on demographic information, lifestyle and eating habits

## Demographic information

Name

Gender

Age

Weight

Height

### Education level

☐ Up to junior high school

☐ Higher than junior high school

## Questionnaire on lifestyle and eating habits

### Lifestyle habits

Yes

NO

Smoking

☐☐

Alcohol drinking

☐☐

Preference for drinking strong tea

☐☐

Preference for drinking coffee

☐☐

Constipation

☐☐

Sleeping on low pillow

☐☐

### Eating habits

Yes

NO

Preference for sweets

☐☐

Overeating

☐☐

Short interval between dinner and sleep(less than 2h)

☐☐

Preference for spicy foods

☐☐

Preference for acidic foods

☐☐

Preference for noodles

☐☐

Preference for fried and fatty foods

☐☐

Preference for fruits

☐☐

Date
