# Supplementary material for: Study on the relationship of depression, anxiety, lifestyle and eating habits to the severity of reflux esophagitis
Source: Research Square preprint supplement (doi:10.21203/rs.3.rs-108003/v1), 2020-12-02
Supplement: Supplementary file 2 [file 85ceb94b37cf6c2917d7aa8f.pdf]

**Additional file 1 of Study on the relationship  
of depression, anxiety, lifestyle and eating  
habits to the severity of reflux esophagitis**

**Rongxin Wang, Jing Wang, Shuiqing Hu**

## Additional file 1: Table S1-Questionnaire on demographic information, lifestyle and eating habits

### Demographic information

|                                                         |        |     |
|---------------------------------------------------------|--------|-----|
| Name                                                    | Gender | Age |
| Weight                                                  | Height |     |
| Education level                                         |        |     |
| <input type="checkbox"/> Up to junior high school       |        |     |
| <input type="checkbox"/> Higher than junior high school |        |     |

### Questionnaire on lifestyle and eating habits

|                                                       |                          |                          |
|-------------------------------------------------------|--------------------------|--------------------------|
| <b>Lifestyle habits</b>                               | <b>Yes</b>               | <b>NO</b>                |
| Smoking                                               | <input type="checkbox"/> | <input type="checkbox"/> |
| Alcohol drinking                                      | <input type="checkbox"/> | <input type="checkbox"/> |
| Preference for drinking strong tea                    | <input type="checkbox"/> | <input type="checkbox"/> |
| Preference for drinking coffee                        | <input type="checkbox"/> | <input type="checkbox"/> |
| Constipation                                          | <input type="checkbox"/> | <input type="checkbox"/> |
| Sleeping on low pillow                                | <input type="checkbox"/> | <input type="checkbox"/> |
| <b>Eating habits</b>                                  | <b>Yes</b>               | <b>NO</b>                |
| Preference for sweets                                 | <input type="checkbox"/> | <input type="checkbox"/> |
| Overeating                                            | <input type="checkbox"/> | <input type="checkbox"/> |
| Short interval between dinner and sleep(less than 2h) | <input type="checkbox"/> | <input type="checkbox"/> |
| Preference for spicy foods                            | <input type="checkbox"/> | <input type="checkbox"/> |
| Preference for acidic foods                           | <input type="checkbox"/> | <input type="checkbox"/> |
| Preference for noodles                                | <input type="checkbox"/> | <input type="checkbox"/> |
| Preference for fried and fatty foods                  | <input type="checkbox"/> | <input type="checkbox"/> |
| Preference for fruits                                 | <input type="checkbox"/> | <input type="checkbox"/> |

Date
